# Supplementary material
Source: MDPI journal article supplement (https://www.mdpi.com/2306-5710/8/4/84)

# Effect of High-Pressure and Thermal Pasteurization on Microbial and Physico-Chemical Properties of *Opuntia ficus-indica* Juices

Ricardo M. Ferreira, Renata A. Amaral, Artur M. S. Silva, Susana M. Cardoso \* and Jorge A. Saraiva

LAQV-REQUIMTE, Department of Chemistry, Campus Universitário de Santiago,  
University of Aveiro, 3810-193 Aveiro, Portugal

\* Correspondence: susanacardoso@ua.pt

Figure S1. Principal components analysis (PCA) of *Opuntia ficus-indica* cv 'Rossa' (red juice), cv 'Gialla' (orange juice), and cv 'Bianca' for non-pasteurized (green) samples and the two processing methods (High pressure processing (blue), and Thermal pasteurization (red)), showing the correlation between the different treatments and the physico-chemical and nutritional characteristics of *Opuntia ficus-indica* cultivars.

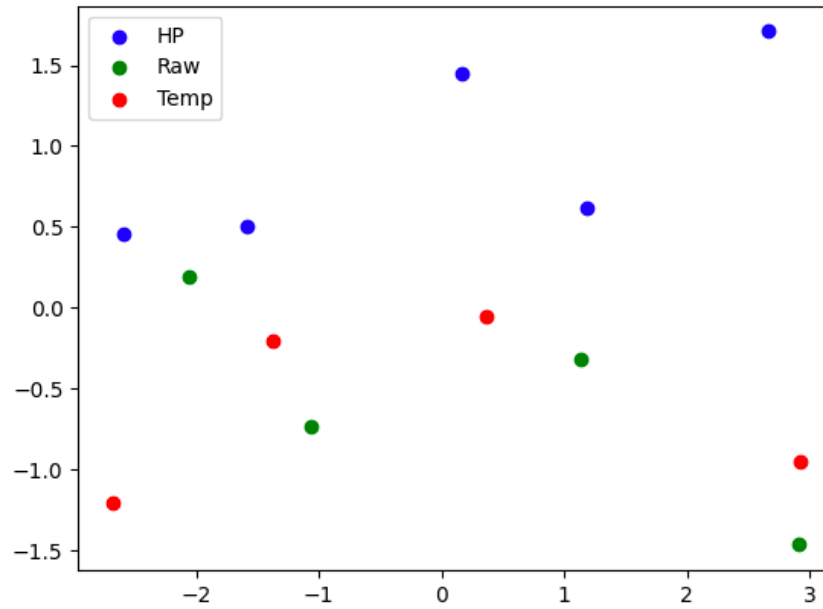

Supplement: s1 [file s1]
